# Supplementary material
Source: PubMed Central journal article supplement (PMC1851580)

anti-Flag-coated  
Dynabeads

■

+

175 —

83 —

62 —

47 —

31 —

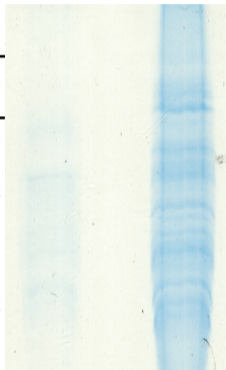

1

2

3

4

5

6

7

8

9

6

9

10

Supplement: pnas_0700760104_1.pdf [file pnas_0700760104_1.pdf]

| Fractions |  | Bound |   |   | Unbound |   |   | Medium |   |   |
|-----------|--|-------|---|---|---------|---|---|--------|---|---|
| PNGase F  |  | -     | + | - | -       | + | - | -      | + | - |
| Endo H    |  | -     | - | + | -       | - | + | -      | - | + |
| Lane      |  | 1     | 2 | 3 | 4       | 5 | 6 | 7      | 8 | 9 |

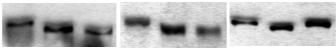

**ApoB-100**

Supplement: pnas_0700760104_2.pdf [file pnas_0700760104_2.pdf]

**A**

|                    | Medium |    |     | Cellular Extract |    |     |
|--------------------|--------|----|-----|------------------|----|-----|
| MTP Inhibitor (nM) | 0      | 10 | 100 | 0                | 10 | 100 |
| Lane               | 1      | 2  | 3   | 4                | 5  | 6   |

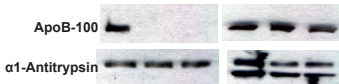**B**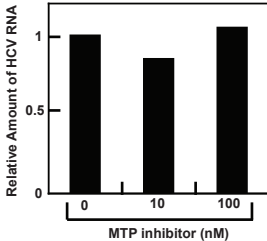

Supplement: pnas_0700760104_3.pdf [file pnas_0700760104_3.pdf]
